# Supplementary material for: A genomic island integrated into recA of Vibrio cholerae contains a divergent recA and provides multi-pathway protection from DNA damage
Source: PubMed Central journal article supplement (PMC4405046; doi:10.1111/1462-2920.12512), 2014-06-26
Supplement: emi0017-1090-sd2.pdf [file emi0017-1090-sd2.pdf]

LOCUS RecA\_mobile\_element\_Copy32783 bp DNA linear 20-  
 DEC-2013  
 DEFINITION Vibrio cholerae strain S24.  
 ACCESSION  
 VERSION  
 KEYWORDS .  
 SOURCE Vibrio cholerae  
 ORGANISM Vibrio cholerae  
 Unclassified.  
 REFERENCE 1 (bases 1 to 32783)  
 AUTHORS Rapa,R.A.  
 TITLE An integrated mobile genetic element in Vibrio cholerae  
 provides  
 multi-pathway protection from DNA damage  
 JOURNAL Unpublished  
 REFERENCE 2 (bases 1 to 32783)  
 AUTHORS Rapa,R.A.  
 TITLE Direct Submission  
 JOURNAL Submitted (20-DEC-2013) The ithree institute, University of  
 Technology, Sydney, Sydney, NSW 2007, Australia  
 COMMENT ##Assembly-Data-START##  
 Assembly Method :: NA v. NA  
 Sequencing Technology :: Sanger dideoxy sequencing; Illumina  
 ##Assembly-Data-END##  
 FEATURES Location/Qualifiers  
 source 1..32783  
 /organism="Vibrio cholerae"  
 /mol\_type="genomic DNA"  
 /strain="S24"  
 mobile\_element 1..32783  
 /mobile\_element\_type="other:Genomic Island: RecA  
 mobile  
 element"  
 repeat\_region 1..9  
 /note="Inverted repeat for RecA mobile element"  
 /rpt\_type=inverted  
 protein\_bind 98..113  
 /bound\_moiety="Site for binding of LexA"  
 /function="LexA box"  
 gene 204..1271  
 /gene="RME001"  
 /allele="recA"  
 CDS 204..1271  
 /gene="RME001"  
 /allele="recA"  
 /note="recombinase A protein"  
 /codon\_start=1  
 /transl\_table=11  
 /product="RecA"  
  
 /translation="MDENKQKALAAALGQIEKQFGKGSIMKLGDNRAMDVETISTGSL  
 SLDIALGAGGLPMGRIVEIFGPESGKTTTLTLEVIASAQKQGTCAFIDAHALDPIY

AQKLGVNIDELLVSQPDTGEQALEICDALARSGAVDVIVVDSVAALTPKAEIEGEMGD  
SHMGLQARLLSQSMRKMTGNLKASNCMCIFINQIRMKIGVMFGNPETTTGGNALKFYA  
SVRLDIRRTGAIKEGDEVVGNETRIKVVKNKIAAPFKEANTQILYGKGFNRYGELIDL  
GVKHKLVEKSGAWYSYQGDKIGQGANACKFIEESHISQELEAKLREVLLSPVKAEG  
gene SAVTDHEVFIDSDEATGHEEF"  
complement (1373..2593)  
/gene="RME002"  
/allele="ParB-like nuclease"  
CDS complement (1373..2593)  
/gene="RME002"  
/allele="ParB-like nuclease"  
/codon\_start=1  
/transl\_table=11  
/product="ParB-like nuclease"

/translation="MSSKNEHEHENNEIEDSIVQGLMDKYQKSPSEYLASSKQLIESS  
SLRLDRKVMDEIFKSNSQYYPQLKIINLETPIRHEVVHISPTVARDMLMFSSRGKINT  
DLSNRRVNRSTVKKFTEDMNEGRWCLTGEPIIIIGHDGEILDGHRLEAASKSNYGFIA  
IIIWGISDALAFAHTDTGNIRSRANVLEMAGVSVDARVLSQVAMLSKSFEMTANPYAF  
RGTQGTSTFQPAEILDYVQGKDELAWSVNLVASLAREHKQIQAPQATLAFAYLINEK  
LKTYEGDEIPINPDMYISNIIISGLGQTSIESIEYQVRDYLESIRKESTSYALLCRLSC  
IFKGWNMYFNIPVVGKKVAIRRVANYVKNADGERVPAKAAGNIREAFTIPLSPPGKTP  
gene IRLKKQPAMKKVIR"  
2783..3916  
/gene="RME003"  
/allele="Hypothetical"  
CDS 2783..3916  
/gene="RME003"  
/allele="Hypothetical"  
/codon\_start=1  
/transl\_table=11  
/product="Hypothetical protein"

/translation="MHKFGKVKQLTSYVKVIDLFLNLSLFDIPSELEEFQSIHSRKN  
QKRIELAKTSIEAGLDNLVEVPPPCITFVVAKVLNHKSLRSIVELEYDPLDTMIVDG  
VITLFAMMQISGFSHPFKRRISKDLTQKNCRVRQELASYPVQVNLLFSPTPEPLSQKA  
CITLYKKYSQTESNIYAPLIESLNAELPLNTYVKEIADDIALDSFGGMKTSSVRLSVK  
DPYVTTEATMIRLVLGAIGGADYQDKNKVDLFGSGPFSAEHIDKIKPYICIFMEAWLD  
SVKVQLLSNKNGFHYSTTLWQSLGLVIHNLYLEKKNLEEFKAGAVLGRDLDSKSAKH

```
gene          WGRCGALELDVVGQSYKNVTGGGRALRIALTNYLLGYLSEQEK"
              complement (4204..6225)
              /gene="RME004"
              /allele="DNA mismatch repair;MutL"
CDS           complement (4204..6225)
              /gene="RME004"
              /allele="DNA mismatch repair;MutL"
              /note="Proetin with DNA mismatch repair MutL domain"
              /codon_start=1
              /transl_table=11
              /product="MutL-like protein"
```

```
/translation="MAILQERTTGITDGSIKKRFSGSIPAWKMLSEYIWNGLDAGASNV
NVTININELGGVESIEIHDNGEGIDFHNLDKNFDNWDDSSKKQVTLKGSQGRGRYSFH
KYAATATWYTRRNENARIVIDSSCIKTYKFQPLDEIEQIKDILNNGSGTSVFLSGIT
SEKSQKIPPIESIIDSLSNFEGWKLIVCSEINISVNGTLLTPQHKLFDQDTIEIDENQ
FSSNIIQWLNKPSGEKSYNYFRDLKDELQHRTLTGFNYKNDFDISGYIQSEWFNDFQA
TSSLNNDFFVDNEKTDGSKVLDKLLKELRKKTDEIYQKFLRERAAQLVDEFESKGYFP
VYKWEQDADRLVRIEHTKKLVTSICVADPSAFNGLKAKQTKIIIALLDRLSTSSENDS
LLEILENILDLDKEHLDEFASQISRSKLDHIIISTIGHLQKCDLVIQMKYLFKEHAKD
VLETPDLQGIIEANTWLFQSGYTTIGAEEDDFSKTAKKLRDSLEILDGDKISSDLI
EGATIEGAKGQVDLFLARKMITVDHSTHDEFIKCTIIIEIKRPSVALNKKHLAQAERYA
EVLDKHPAFNDERMRFDIVLVGTKISQNDTQINRRLKDLAGKGGAGLVSGADSRIRVY
VKSWSTIFNDFEVTHRSLLQKDKIQRDELEYKSKTTLVDELQVPLTEEL"
```

```
gene          6547..9219
              /gene="RME005"
              /allele="Type II restriction enzyme"
CDS           6547..9219
              /gene="RME005"
              /allele="Type II restriction enzyme"
              /note="methylase subunit"
              /codon_start=1
              /transl_table=11
              /product="Type II restriction enzyme"
```

```
/translation="MAVNQAKIFEQLEKLVAPDPSEFIYGFLTAFNFPKATLTQIRQ
GGNRNVAKIKGHVGLKNKLYYFPAEGDQDIDTALDDVLADQMIAQNKIRYVLTTFDFER
FLAWDTATNERLDIDFEVLHRNYSFFLPLVGLEKAILNSEKPADVKA AVKMGKLFDLI
RVHNHLNTPEDIHALNVFLTRLLFCLFAEDTGIFPKKSQFTSAIKSMTSEDGSDLDQF
LSDLFVVLNSPEGS DPRNRLPQHLLIDFPYVNGGLFESDESIPKLGKKPRRILIDCGLE
```

DWSAINPDI FGSMFQAVIDVDQRRARLGQHYTSYSNIMKVIQPLFLDPLRLELEKQRKS  
ANGLKRLLVRLGKIKVFD PACGSGNFLIIAYKELRLEIEVIQALMKIDQGGFFISNIH  
LDQFYGIEIDDFACEIARLSLWLAEHQVNKQWEEHIGPPQPALPLKTTGRVVSANSLD  
IDWHTVCPNSGNEEIIYVIGNPPFKGHRGRSDNQSEMVRVFKGFKSIGLLDYVACWFW  
KGAEYIKGTNAELALVSTNSISQGEQVGTLPWSIFNLGVS IHLAYPTFTWANNAKDKA  
AVHVVIIGLTAKSKKGLL FERVEEDWHSRVVDSISPYLLEGGKACVLA AKAPLNSSVP  
PLLFGNMPNDGGYLLLRSERDELI AKEPEAKKWIKKVLGADEF LNSKERWCLWLKDA  
TKSDLASMPVLVQRIEKVAEKRRKSSDKGTQKLADRPHQFRDLN NPSKYILMPSVSSA  
RRRYVPVGVFDES VIISTNLNYIIPNGTMYEFAILSSLIHNDWMRLVAGRMKSDYRYSA  
SVVYNTFPWITPSDAQRKELEVLAE DILFAREDYPGKTLAELYNPDSMPLGLLSAHQK

```
LDTAVDRLYRKKPFNDT SERLACLLSR YEDMVTK"  
gene 9247..11268  
      /gene="RME006"  
      /allele="Hypothetical"  
CDS 9247..11268  
     /gene="RME006"  
     /allele="Hypothetical"  
     /note="Protein with helicase and phosphorothioation  
system restriction enzyme domains"  
       /codon_start=1  
       /transl_table=11  
       /product="Hypothetical Protein"
```

/translation="MKNNILQVSYNQ TGQSASHNDMGMREM QARAF AERASQYLLIKA  
PPASGKS RALMFLGLDKLIHQSVRKLIVAVPEVSI GGSFKD TDLMKFGFFANWTVKPE  
NNLCISGSESGKTNAFKRFMESDDQILVCTHSTLRSVFDKLLPTDFDNCLVAIDEFHH  
VSADENSRLGSLIDVLMKQSSAHIIAMTGSYFRGDTVPILLPEDEAKFTKVTYTYEEQ  
LNGYKHLKTLGIGYHFYQGRYVNALPSVLDPTRKTI IHI PNVNSVESTKD KYTEVDSI  
LEVLGDVMMQDPETGIYQVKCAKTGK TLLVANLVDDSDMRPKVQAYLRNIESAEQMDI  
IIALGMAKEGFDWPYCEHVLTIGYRSSMTEIVQII GRATR DSEGKSHAQFTNLIAQPD  
AQDDDVKVSVNNMLKAITTSLMEQILAPSIQFKPRS QWNGEDLPANTLIVDDTTTSV  
SQKVL DILNRGKDEILSALLSKESVVKGAIADTMPAEVINEIELPSVIQTLYPDLEE H  
EIEQIRTGVLHSLYIGQKGLIDGKDLPEDAVIEDGGASYGNGHKS KDN GESGTSNQF

```

IKMGDKFINIESLDIDLIDSVPNPFHGAYEILSKSVDAAVLKTIIQQTVRASQANVSEEE
      AVMLWPRIKAFKVEHQREPSLNSSDPIEQRYADVLAAYIRRMKQORMAQQ"
gene      11284..12531
          /gene="RME007"
          /allele="Hypothetical"
CDS      11284..12531
          /gene="RME007"
          /allele="Hypothetical"
          /note="YeeC-like nuclease domain-containing protein"
          /codon_start=1
          /transl_table=11
          /product="Hypothetical Protein"

```

```

/translation="MIRLRSSKATEKFDLDDIFSEQDDLGLLDVAPLRAKIPTGNILA
NQFEEISNFYEQNGRVPRSDAQSFYEKRLARRLNFAKSNPEQCDVLSEYDRYSLLDSD
LAAQENVQRDKVEDKSLPTELDKSELVTSLDDIFDDDDGLLEFDAPHLFTKTHVPAE
KKSQPNEIARRQPCAEFHRFSPIFETIQQEIRSGSASLERFRHELQMRVGDVFIENGL
IGYVHSAGERLEGYSSYNARLHLIFENGTEMHMLFQSLTHGLVRDERGCKIIREGESL
EPDDTPVPAGLVYVLATKSTDSALAPYKANLYKVGFTDGKVEERIKYAEKDKTFLEAP

```

```

VRVVMTECYNIDAHKLETLIHGFLGHRRLNVTILKGHAGQYSPREWFYVPLNNTVLEVI
      GYILDGTISQYRMDNTTGKVVKK"
repeat_region 12870..12876
              /note="Direct repeat for insertion of ISVvu4"
              /rpt_type=direct
              /rpt_unit_seq="ccttaag"
mobile_element 12877..14083
              /mobile_element_type="insertion sequence:ISVvu4"
gene      13036..14025
          /gene="RME008"
          /allele="Transposase for ISVvu4"
CDS      13036..14025
          /gene="RME008"
          /allele="Transposase for ISVvu4"
          /codon_start=1
          /transl_table=11
          /product="Transposase"

```

```

/translation="MQKNSVMYLEPVRLWGYQEILSTVXQELVETGGIDALINRSRRA
PNLKNRVDSETEQAVIKYAIIDFPAHGQVRTSNELRKLGVFISPSGVRSIWLRNDLENF
KKRLIALEKQVAENGIILTDEQVAALERKKHDDEACGEIETAHPGYLGSQDTFYVGNL
KGVGRIYQQTTFVDYTSKVAFAKLYTTKTPITAADILNDKVLPPFEAHELPLRILTD
R
GTEYCGRVEQHDYQLYLAINDIDHTKTKAMSPQTNIGICERFHKILNEFYQVTFRKKL

```

```

YGSIEELQKDLDEWMDYNNHRTHQGKMCCGRTPIETLEDGKSIWAEKNLAQI"
  repeat_region    14084..14090
                   /note="Direct repeat for insertion of ISVuv4"
                   /rpt_type=direct
                   /rpt_unit_seq="ccttaag"
  gene             complement(14114..14731)
                   /gene="RME009"
                   /allele="Hypothetical"
  CDS              complement(14114..14731)
                   /gene="RME009"
                   /allele="Hypothetical"
                   /codon_start=1
                   /transl_table=11
                   /product="Hypothetical Protein"

/translation="MPMFKYHLDTTKLSVNGQGFSVLQVYTDTKVTNSQLFINVNDL
VENSPLTRGEVNEHVANASEEQVIIDQEQTLIRVSSALKLNDPKLRDVPNVRSQAQQ
FEQVIDKINMMPKLNNEERAIASETVTKTKSTKAKQDYKNQRVIQGLGNVCEKTNQPIPO
  gene             complement(14734..15192)
                   /gene="RME010"
                   /allele="Hypothetical"
  CDS              complement(14734..15192)
                   /gene="RME010"
                   /allele="Hypothetical"
                   /codon_start=1
                   /transl_table=11
                   /product="Hypothetical Protein"

/translation="MFMSDTNLPIELKPLSELIDVKPIEISPDLDEKLTENNQVLVSK
SIMKIDHQTKTPTPPFFSVDSLVSIGTDRKPFRELMADAADGEVIKINNKYLRSDLT
  gene             complement(15199..15609)
                   /gene="RME011"
                   /allele="Hypothetical"
  CDS              complement(15199..15609)
                   /gene="RME011"
                   /allele="Hypothetical"
                   /note="DnaJ domain-containing protein"
                   /codon_start=1
                   /transl_table=11
                   /product="Hypothetical Protein"

/translation="MTSLYVVVFALLLTVVQLLFLLRKYKKKIQELQSTYVESSTTAE
EADLQVNLVVRTSTDDMAYFKSENDRILFLLLEVDGKRRNQLLGITSEMYEDEDAAKKW
  repeat_region    15890..15896
                   /note="Direct repeat for insertion of ISVuv4"
                   /rpt_type=direct

```

```

mobile_element  /rpt_unit_seq="cctaaat"
                15897..17103
                /mobile_element_type="insertion sequence:ISVvu4"
gene           16056..17045
                /gene="RME012"
                /allele="Transposase for ISVvu4"
CDS           16056..17045
                /gene="RME012"
                /allele="Transposase for ISVvu4"
                /codon_start=1
                /transl_table=11
                /product="Transposase"

/translation="MQKNSVMYLEPVRWLWGYQEILSTVIQELVETGGIDALINRSRRA
PNLKNRVDSETEQAVIKYAIIDFPAHGQVRTSNELRKLGVFISPSGVRSIWLNRNDLENF
KKRLIALEKQVAENGIILTDEQVAALERKKHDDEACGEIETAHPGYLGSQDTFYVGNL
KGVGRIYQQTFFVDTYSKVAFAKLYTTKTPITAADILNDKVLPPFEAHELPLRILTDR
GTEYCGRVEQHDYQLYLAINIDIDHTKTKAMSPQTNNGICERFHKTILNEFYQVTFRKKL
YGSIEELQKDLDEWMDYNNHRTHQGMCCGRTPPIETLEDGKSIWAEKNLAQI"
repeat_region 17104..17110
                /note="Direct repeat for insertion of ISVuv4"
                /rpt_type=direct
                /rpt_unit_seq="cctaaat"
gene          complement(17211..17645)
                /gene="RME013"
                /allele="Transcriptional activator SoxR"
CDS          complement(17211..17645)
                /gene="RME013"
                /allele="Transcriptional activator SoxR"
                /note="Redox-sensitive transcriptional activator
SoxR"
                /codon_start=1
                /transl_table=11
                /product="Transcriptional activator SoxR"

/translation="MIRNDYLTVGQLSERSGVATSALRFYETKQLITSFRTNSNQRRY
LPSMLRRVALIQVAQSVGFLEEIRYELSTLPMNKTATKQDWDVAKKWQDLDKMMV
KIQSLKDNLSGCGIGCGLSMKKCHLFNPEGLYEQGAQRTIR"
gene         17963..18844
                /gene="RME014"
                /allele="Drug/metabolite transporter (DMT)"
superfamily"
CDS         17963..18844
                /gene="RME014"
                /allele="Drug/metabolite transporter (DMT)"
superfamily"
(DMT)      /note="Permease of the drug/metabolite transporter
(DMT)"

```

```

        superfamily"
        /codon_start=1
        /transl_table=11
        /product="Permease of the drug/metabolite
transporter
        superfamily"

/translacion="MLKNYFTLIAIGLIWGSQFIFQETALEAFTPVWIGTFRAVLGAT
TLFIICRIMRICSSSKQWKLYTVIGFLEATVPFVLPFAQKELSSSVTAILMGTLPFY
ALLLAPLFIRNTKITKGNLFSITIGFFGLVVLFPDLISSQRIELVSVLAVLLAAVC
FAIALLLLNRVQREHPLIVARNVLTMASIQLIIVALITTRMTYKAPSPSIFIAYIYL
GVMCAGVVYYLYMTSVKNAGAVFTSMTNYLVPVAVGVLIAALVTNESIQTTTWLALGII
        gene          complement (19225..21105)
        /gene="RME015"
        /allele="Hypothetical"
        CDS          complement (19225..21105)
        /gene="RME015"
        /allele="Hypothetical"
        /note="chromosome segregation ATPase-containing
protein"
        /codon_start=1
        /transl_table=11
        /product="Hypothetical protein"

/translacion="MTQYKPFLLVKRLVITKGKSIAYDEKFTAGVNIIRGVNSSGKST
ISDFIFYGLGGDLTKLKNEAKQCSFVFEASLSGKVFTLKREIAEGGRKGMDFISGDY
ESAYVASVTDWIRYPYNANTKESFYQALFKELGMPYKSDDKNSITMHQLLRMLYVDQ
MTSPDRLFKFDKFDSPNKRQAIGELLIGLSDFELYEKRVRLQSLKLALENRIKEIKTI
HSFLGGTIKSVSEINGEIEEKRKEIDALELEVESFSSPSEDGCTEDEVLKNLIVEVQE
ARGKYTASQQEIAKTSFEINDSQMFIESLSRRVKALKETQDTINALSDVAFNHCPACQ
TEVQARPTGCSLCGATKPESENNIDPTFKVRKEIEFQIAESILLIEKKQIRLDEQKVE
SNQLETKLGELELDLEIIRKPQRAVNIQLRQKLSEIGGLRNEIRTLNNSKKEFAKLYG
LYDERDTLQTDFNLTNDEITRLTQRMENELKAKKRKLSEATLSILKADAGHEEIFVDG
SKVEFDFAEDRVTIDDRALFSASSMVYLKNAFRLAMLKCSCEDSSYLYPRFLMDNIE
DKGMEEERSQLFQREIVKLSNSLDVEHQIIFTTSMIDSDLNHSEYCVGDFYNMHNKTL
        gene          complement (21598..22080)
        /gene="RME016"
        /allele="Hypothetical"

```



```

CDS          complement (21598..22080)
              /gene="RME016"
              /allele="Hypothetical"
              /codon_start=1
              /transl_table=11
              /product="Hypothetical protein"

/translation="MYRQDHRRLRELVEEHEKEIQKDEQYKEFSSQLNNFLERKVEGKL
RDLGQKLTGDNRFLLDYAMDVKERVSKKIMQFShyKSAQELYTYILTNIrTTFLHEI
SPRIKSGDFKvyQINDLVEEKIIPVLESVHGCSLNIDKDELYGLLYILTGNcyVEWD
"
gene          complement (22683..23939)
              /gene="RME017"
              /allele="Error prone, lesion bypass DNA polymerase V
              (UmuC) "
CDS          complement (22683..23939)
              /gene="RME017"
              /allele="Error prone, lesion bypass DNA polymerase V
              (UmuC) "
              /note="Error prone, lesion bypass DNA polymerase V
              (UmuC) "
              /codon_start=1
              /transl_table=11
              /product="UmuC"

/translation="MFALVDANSFYCSAEQVFRPDWRGKPMIVLSNNDGCIVAANRQA
KEVGIEKFKPYFQVKALCEQKGVIALSSNYELYADLSAKMMQVIGRFAPEQHIYSIDE
SFLSFEHSFPAIRSLKEHGMKLRRAVWRECRLPVCVGFQTLTLAKVANHAACKIEGY
NGVCVLDSErERKAVLGQLHVSEVWGIGRKLTHRLEMMGINTALKLANYPALIRKEF
NVEVERTVRELNGQCKGWDAARADKKQIFSTRSAGQRITDLESLQQALCKHANIASF
KARKQKSLCRVMLCFANSSPFDSPPVARRAVHRFAYPTADVTLITQAASRLAEQLFQQ
DVRFYKIGVGLIDLVDGQHEQPDLFNLTpNNPKLMNVYDTLNNRFGNDAlFLAAQGIT
QKWAMRREMLSPQYTTTRWQDLPKIKC"
gene          complement (23939..24199)
              /gene="RME018"
              /allele="Error-prone repair protein (UmuD) "
CDS          complement (23939..24199)
              /gene="RME018"
              /allele="Error-prone repair protein (UmuD) "
              /note="Error-prone repair protein UmuD"
              /codon_start=1
              /transl_table=11
              /product="UmuD"

/translation="MQDVGIFDKDLLIVDRSLDVQDFDIIVANLNGEFICKQIDLNRr
LLLSANERYQPVPiHEFDQFSLEGIVTRSIRCHRVSPLLRTR"

```

```

protein_bind    24359..24374
                /bound_moiety="Site for binding of LexA"
                /function="LexA box"
gene            24984..25739
                /gene="RME019"
                /allele="Hypothetical"
CDS             24984..25739
                /gene="RME019"
                /allele="Hypothetical"
                /note="Multi domain XerS site-specific tyrosine
                recombinase XerS"
                /codon_start=1
                /transl_table=11
                /product="Hypothetical protein"

/translation="MLWSKMPKWI AEGILRESFSGGRSVSDDIAALKLFIVLCFLAK
QVNRSSGSSVDDVLEIRATYDQLTDMCSLSRSLVSRGLKKLHITGLLSSAGVRTKTYT
FIQGVYRGWCKLPKRALVKNEEEI PAMKAFLNRYSHERDALKCFLYILASRSNSRTYV
DLSRGTIAKKTGVSLDAIDGAIGFLQSTSLISKVEDKGFLANSIRRDLSERLHRYWVI
GSSSLNYKTYSESEDSIFVREPSLYFMENRR"
gene            complement (26001..27461)
                /gene="RME020"
                /allele="Hypothetical"
CDS             complement (26001..27461)
                /gene="RME020"
                /allele="Hypothetical"
                /codon_start=1
                /transl_table=11
                /product="Hypothetical protein"

/translation="MKLDSLKIDVKDCLPSDESDPNISWESSLFLHGNGEVNWFATDF
LMSDAIPNRSKKTAKGMIRYFLEYLECYENWKYNDIQGRPFPIGLITDSHLYDYVQYI
EDDIGLNRNAIANRVRMALRFLEYVQKYHLSYTLIAIAN TDGEYFTKGLVNAERKIS
PYGKRYLHHD CIPHCE SYGSRSPITDTAIESLYDDL DILEAEGDLYRFEFFSTLISLL
EATGIRVSEAA NIDTHTIEVLRAQVNASLSGKAIGLDEIISLNKLTINTQSLQAAQAI
YRKSALGSANDQLIWIKIKTTKGKNKDKFRIIPISFTTAQYLIRFYDDYIVNELDRIS
KGLAKVNRAKFGKLFVHPSSHLPMSGIMISRLFYDVFSRKFKSKHKRSPHLFRHRFIT
LLVLQQLKALKTNIGGTQLAILILNRIKGLTGHASIKAMLHYVELAEAELEYEDESE
VFDRVTRDHLVAELGAEHVAEIEAGLRLKKAQAFI"
gene            complement (27465..28181)
                /gene="RME021"
                /allele="Hypothetical"
CDS             complement (27465..28181)
                /gene="RME021"

```

```

        /allele="Hypothetical"
        /codon_start=1
        /transl_table=11
        /product="Hypothetical protein"

/translation="MKMNLKRELSPNHNGPKGRRDTLEQVKLRVILLNDFIENGVPDG
FTAHISLKALLAYSDSGKIQRSYPAIYNKKKILVKEIDPSFTGSASSVVDCKDYLLL
KIEELRSKIETTSTPSEQVTEAENECNDDDPKVKTGELRSALKEQAELIESLAREI
LRQRSANNTLISLIKERDKYASRTLKSYEDHQTELCKVRTVIKPALRETISNLNKLK
        HEFDDIFAESEENIVSIFGK"
        gene        complement (28165..30198)
        /gene="RME022"
        /allele="Phage integrase"
        CDS        complement (28165..30198)
        /gene="RME022"
        /allele="Phage integrase"
        /note="Protein containing phage integrase family
domain
        protein"
        /codon_start=1
        /transl_table=11
        /product="Phage integrase"

/translation="MTLININNVKLREGADWSYKSDDTSKWHFAWLHGNFSDSVWHID
NGSGKSGSDLPYISFNDYIPTTGDTLDEDKYLIVTNTIRKVIALNRTGHLSTETKNSS
LLTRFSSMNSNAIALKILALFLIKEYGESAVSEEGFNLLTTDIRKFHLEIATGRADK
ATGLTDIILEKISTMDRESAIQLFDINVESKNNELPVGEFLQRIGMQNTSISDFTMNL
ISDRLVERFPDLSLTITGNNGKKSEFPNSCPKLFTGKENNISSSTFDALTKGPLLLK
RYSNYLPELENYCNPIAKVSKSFKKNHIRSKGRTPNIPTKTALHYLNEAIRIVVVYGE
SIVATKINCELQLNKIHKNNPSYLRSHIFEGRYPVNVAIPKNKFTQDFKVTRYNELQK
GSTPKKLRENVTVLFGYRILLAATYILTHTFCIKRTTEILELKESNLELGFWGGYELF
FGIRKAAPTENSILVTGRPIPHVLFEGISYLAEANEHYECENEDPFLFPEKYTSAAEG
LPPKNSKMSRFAMSNILKDFGDFIQVPTMVNGIESRFYLSRTHVLRRAAFYALT
DISDFPAISWLMGHRSTQETWRYLLEDVSNHEELSEEEAQGVLDAIYKKGVDTSQVENV
IKTELNIKFNNOQDELAKEFIKEQLLSGSKIYSYTDSESGKVIVWMEVGNEDS"
        gene        complement (30185..32131)
        /gene="RME023"
        /allele="Hypothetical"
        CDS        complement (30185..32131)
        /gene="RME023"

```

/allele="Hypothetical"  
/codon\_start=1  
/transl\_table=11  
/product="Hypothetical protein"

/translation="MNIKEHTINGMHCQKIMAHQYAVNMSISITKILSGKSDSYKRRT  
TRMLNEFFTFCYKNNLHMKTGADVSLCYSAWQEFYFSGAVKKQPHTLLSDSRSLWSAL  
LRLCKRSVNGLPKTNHITPPRRLNTLVFSDTTNSQAKVLGGFQLSTNTTGESLTLILE  
TDVDAFLGNLISTMKKHRDVIYKVSYSYLIDACDRFTFGQEAMEKIDASVFENNPTLL  
HPSLLNGKGSRLSLFNPDLPNGECGKTNLLAYIGHCKNGLVDRHFLGGNNHLYRFTSN  
QYELREHFGLSTLSAVACCNIIITESGINVDSLRLKLSAQGSINKIFEPSQHGFRVS  
YHKARAKEHLKRNLRHATDTPFIEKAFNYIIIEATSYHRSLASGNDANRLFLYQTATAT  
HKVMPMSDMAFKSGFVRLLEAKKILKNTPNWCEGVTPECIDEVLMAAPTAKKLRAE  
GVIRWYESGGNPAAVAAKYLGNSEAVSIRNYLPQELQLAVYNQVRVRFQHVLISSATDG  
QKYQIKALKLKDTELTEYLSRLDERIPHWRSVIETISDNNRNSSTASDIKITLDICP  
ENIALMKACHEIAMQRIDSANHTEDSISELSFVYQGLTGYLNTHPDRRLMRTLQKGNL  
LYEKKTGSLLDLKI IKQEVQYDSN"

repeat\_region 32775..32783  
/note="Inverted repeat for RecA mobile element"  
/rpt\_type=inverted  
/rpt\_unit\_seq="cgataaaat"

BASE COUNT 9474 a 6453 c 6605 g 10250 t 1 others  
ORIGIN

1 attttatcga agagagatta gctgcttagt ataaggtaga actagtttga  
ttagtgcctt  
61 ttaaaacaat ccgctcataa gtcagtaatg cttcactcag ttataaataa  
ttgaatgtat  
121 attcatttta gatttgaatt agaaagacta aattgaatat gcattacgtg  
cataactaaa  
181 tagaattcag agggtatata aagatggatg agaacaagca gaaagcgta  
gcagcagcgc  
241 tcggccaaat tgaaaaacaa ttcggtaaag gctctatcat gaaattgggt  
gacaaccgag  
301 caatggatgt tgaacaatt tctacagggt cactttcttt agatattgct  
ctcgggtcgg  
361 gtggtttacc tatgggtcgc atagtagaga tctttggccc tgagtcatca  
ggtaaaacaa  
421 cgcttactct tgaggtaatt gcttcggcac agaagcaagg taagacttgt  
gctttcattg  
481 atgcagagca tgcgctagac ccgatttatg ctcaaaaact aggtgttaat  
attgatgaat  
541 tacttgtttc tcaacctgat acaggtgagc aagctcttga gatctgtgat  
gcgcttgctc

601 gttcaggagc tgttgatgta atcgttgttg actctgtagc agcattgaca  
cmetaagctg  
661 aaattgaagg tgaaatgggc gattcacata tgggcctcca ggccaggctt  
cttagccagt  
721 cgatgcgtaa aatgactggg aatttgaagg cttcgaattg catgtgtatc  
tttattaacc  
781 agattcgtat gaagataggt gttatgtttg gcaaccaga acaactact  
ggtggtaatg  
841 ctctaaaatt ctacgcttct gttcgtctgg atattcgtcg tactggtgcg  
atcaaagaag  
901 gtgatgaggt cgtgggtaac gaaacgcgta tcaaagttgt caagaacaag  
attgcagcac  
961 catttaaaga ggcaaacacg caaatccttt atggcaaggg cttcaaccgc  
tatggtgagc  
1021 taattgacct tggcgtaaa cacaaactgg tcgaaaagtc tggcgcttgg  
tacagctatc  
1081 aagggtgataa gatcggtcag ggtaaagcaa atgcctgcaa gtttattgaa  
gagcatagtc  
1141 atatttctca agagttagaa gctaaactgc gtgaggtact attatctcct  
gtcaaggctg  
1201 aaggttcagc ggtcaccgat catgaagtgt tcatcgactc tgatgaggca  
actggacacg  
1261 aagagtttta atctttagtt tgacacctaa aggtaaattc taaaaaagc  
gccctgcata  
1321 atgggcgctt ttacatttca tatattcctt aacttattgt ttagggctgt  
ttttatcgaa  
1381 tcaccttctt catagcaggt tgctttttta acctaatagg cgtctttccg  
gggggggaaa  
1441 gaggtattgt gaaagcttct cttatatctc ctgctgcttt tgctggaact  
cgttcaccat  
1501 cagcattttt cacatagttc gctacacggc gaattgctac ctttttgcct  
acaaccggaa  
1561 tattaataaata catgttccat cctttgaaaa tgcatgataa acggcatagg  
agtgcataag  
1621 atgttgattc tttccttata gattcaagat agtctcgaac ctgatattca  
atactctcta  
1681 ttgacgtttg ccctaaccct gagatgatata tagatatgta catatcagga  
ttaattggaa  
1741 tttcatcgcc ttcgtagggt tttagttttt catttatgag ataattgtgca  
aatgccaaag  
1801 ttgcttgagg tgcttgaatc tgttgcttat gttctctagc taaagaagca  
accaaattaa  
1861 ctgaccacgc taactcatct ttaccttgta cgtaatcgag tatttcagca  
ggttggaatg  
1921 aagtgccttg agtacctcta aatgcatacg gattggctgt catctcaaaa  
gattttgaaa  
1981 gcattgcaac ctgagacagt actctagcat ctacgctaac acctgccatt  
tcaaggacgt  
2041 tagctctgga gcgaatatta cctgtatctg tgtgagcaaa tgctagagca  
tcagagatcc  
2101 cccatataat gatcgcaata aatccataat ttgattttga tgcggcctct  
agtcttgtat  
2161 gaccatccag tatttcacca tcatgaccga taatgatcgg ttctccagta  
aggcaccacc

2221 gtccttcatt catgtcttcc gtgaactttt tgactgtact tcgattaaca  
cgacgattgc  
2281 ttaaatacggg attaatTTTT cctctacttg aaaacatgag catgtctctg  
gcgacggttg  
2341 gtgaaatatg cacaacctca tgtcgaatag gagtctctag atttatgatc  
ttgagttgag  
2401 ggtaatactg ggagtttgat ttaaagattt catccattac cttcctatct  
agtctgagac  
2461 tggatgattc aattaactgc tttgagctgg ctaggtattc actgggagat  
ttttgatatt  
2521 tatccatcaa ccctgaaca attgaatcct ctatctcatt gttttcatgt  
tcattttcat  
2581 ttttgctact catcatttac ctcaaactct tcaggttcat agatcaaaaa  
ccttccaatt  
2641 ccacaaagtt agtgtttaat tgttgatcgg acggggcgtc cgatcaatat  
ttattttaat  
2701 ctcaatttag aatgcaaact caacatagtg aggggttcat tcattgaaaa  
agacatcagt  
2761 gaggctggaa ggcttatgct caatgcacaa gtttggtaaa gttaaacaac  
taacttcata  
2821 cgttaaagtc attgatttat ttaacttatt ctcgctattt gacataccaa  
gtgaacttga  
2881 agaagcattt caatcgatac acagccgaaa gaatcaaaaa aggatcgagc  
tagcaaaaac  
2941 ttctattgaa gcgggcttag ataacttagt tgagggtgcct ccgccatgta  
tcacatttgt  
3001 tgtggcgaaa gtcttaaadc ataagagttt aagtagaagt atcgtagaac  
tagaatacga  
3061 tccactcgat actatgattg tggatggtgt gattacgttg tttgccatga  
tgcaaattag  
3121 tgggttttagc catccatttg agaaaaagcg tatatctaag gatttaactc  
agaaaaactg  
3181 tcgagtttag caagaactcg caagttatcc cgtacaagtt aacttgttgt  
tctcacctac  
3241 agaaccattg tcacaaaagg catgtatcac tctttataaa aaatacagcc  
aaactgaaag  
3301 caacatttat gcacctttga ttgaaagtct aaatgcagag ttgcctctga  
acacttatgt  
3361 aaaagaaatt gcagatgata tcgctcttga ttctttcggg ggaatgaaaa  
cgtcgtcagt  
3421 taggctgtcc gtaaaagacc catatgtgac tactgaggca acaatgattc  
gtctagttct  
3481 tggtgcaatc ggtggtgcag attaccaaga taaaaacaaa gtcgatttgt  
ttggttctgg  
3541 gccatttagt gccgagcata tcgataaaat aaagccttat atttgtatat  
ttatggaagc  
3601 gtggcttgac tcagtaaagg ttcaactgct ttcaaataaa aatggctttc  
attactcaac  
3661 gacgcttttg caatcactag ggctagtcat acataacctt taccttgaga  
aaaaaaactt  
3721 agaagagttt gctaaggctg gggctgtttt aggtcgtctg gattactcca  
aatcagctaa  
3781 gcaactgggga aggtgcggtg cgctggaact tgatgtgttg ggacaaagct  
ataaaaacgt

3841 tacaggaggt ggtagagctt tgcgtattgc cttactaac taccttcttg  
gatacttatac  
3901 agagcaagaa aagtaagaat gtttctattg tccactcatg gtcaatgatg  
gtcaatgggtg  
3961 aacaattgct taatttaaaa gaggaaggt atgagcttta aggcagttaa  
atgacaacct  
4021 aacatttagt taatgtttga attgtcgagg attttattct tgaagtacaa  
gtaagagctg  
4081 tctctaggtt tgttctgtaa agtatttgcc ccccccccc aaaaaaaaaag  
gcaagctatg  
4141 ggggtgggcta tgtagttgag ttgaagccgc gcctgtgaac aaacaacctc  
aacactagtg  
4201 aaatcacaat tcttcagtta gaggaacttg taattcatcg acaagagtgg  
ttttggattt  
4261 atactccagc tcactctctt gtatttttag cttctgcaac aaagatctgt  
gggtaacctc  
4321 aaaatcattg aatcctgtag accaactttt gacgtataca cgtattcttg  
agtcagcccc  
4381 agaaactaga cctgcaccac ctttacctgc aaggctcttt aagcgcctat  
tgatttgggt  
4441 gtcattctga gagatttttg taccaactag aacaatatcg aatcgcattc  
tttcatcgtt  
4501 aaaagctgga tgcttatcta aaacttcagc atagcgcctca gcttgagcca  
aatgtttctt  
4561 atttagagcg acacttgcc tctttatctc tatgattgta cattttatga  
actcatcatg  
4621 ggtcgagtga tcaaccgtaa tcactctacg agcaaggaat agatcaacct  
gccctttgc  
4681 cccctctatg gttgccctt caatcagatc gctggagcta atcttgtccc  
cgtctagtat  
4741 ttctaaatct gaatctctca gtttttttgc tgttttagaa aaatcatctt  
cctcagctcc  
4801 tatagttgta tactgagagc caaataacca tgtgtagct tcaataatac  
cttgtaaatac  
4861 aggagtttcg agaactctt tagcatgctc tttgaataga tatttcattt  
ttgtagatgac  
4921 taagtcacac ttctgaaggt gtccaatagt gctaattatg tgatcaagtt  
tagatctact  
4981 gatctgagag gcaaattcgt ctaagtgctc cttgtctaag tctaaaatat  
ttccaatat  
5041 ttccagtaag ctatcatttt cactagacgt tgagagtcta tccagcaaag  
cgatgataat  
5101 tttagtttgt tttgccttta ggccattgaa agcggatggg tctgcaacgc  
agatgctggg  
5161 gactaacttt ttagtatgct caattcttac caacctgtct gcatcttgtt  
cccatttata  
5221 tactggaaaag tctccttttg actcgaactc gtctacaagt tgagcggctc  
tttctctcag  
5281 aaacttctga taaatttcat cagtcttttt gcgcaactct tttaatagtt  
tatctagaac  
5341 tttagacca tctggtttttt cattatcaac gaaaaaatcg ttattgagag  
atgaggtggc  
5401 ttgaaaatca ttaaaccatt cagactggat gtaaccgctt atgaagaaat  
catttttgta

5461 gttaaaacca gtaagagttc ggtgttgcag ttcattctttt aagtccctaa  
agtagttgta  
5521 agatTTTTcc cctgatgggt tgtttagcca ttgaataata tttgatgaaa  
actgattttc  
5581 atcaatctct atagtatctt gaaatagctt gtgttgaggg ggtgttagta  
gagtaccggt  
5641 gactgaaatg ttgatttcgg agcaaacaat tagcttccag ccaaattcat  
ttgacagaga  
5701 atctatgata ctttcaattg gtggatattt ttgagatttt tcaactagtga  
tgcctgaaag  
5761 gaaaactgat gttccactac cattattaag aatgtctttt atttgttcaa  
tttctgctaa  
5821 tggctgaaat ttgtaagttt tgatacagct tgagtcaatt acaatacgcg  
cattttcatt  
5881 atttcttctg gtataccaag tcgctgtggc ggcatacttg tgaaacgaat  
aacggcctct  
5941 gccctgacta ctttgagcgc tcaactgttt ttttgaagaa tcgtcccaat  
tgtcaaagtt  
6001 tttatctagg ttatgaaagt ctataccctc tccattgtca tggatttcaa  
ttgactcaac  
6061 gccaccgagt tcattgatgt taatagttac attgacattt gaagcgcctg  
catccaaacc  
6121 attccagatg tattcactca acattttcca agcaggaatt gaaccaaatc  
tttttttat  
6181 cgaaccatct gtaatgccag ttgttctttc ttgaagtatc gccactgact  
aacctttct  
6241 tcagtacatt ccacacaaat catcttaacc taagtcacgg gaattattaa  
ttataattga  
6301 tgaacctttg ctgtccgact aggccatgta ccatctatta cagcacctgt  
taagcacata  
6361 tcacggaagc atcaaagatc cttccacaaa aggcattggtt acgacagtgg  
aaaattttct  
6421 agcagtagca atccccttg tttctgtgtg gtagatattt gatatgaatc  
tcaatgatta  
6481 aagtgtgttt tatttgtata atttcccga tttatggcgc gattcgcaaa  
ccaatttagg  
6541 aacaccatgg ccgtcaacca agcaaaaatc ttcgaacaac tagagaaact  
tgttgaagct  
6601 cctgacccta gtgagttcat ctatggattt cttacagcat tcaatttccc  
taaagcaacg  
6661 cttactcaaa tacgtcaagg tggcaaccgt aacgttgcca agattaaagg  
tcatgttggg  
6721 ctaaagaata agctgtatta cttcccagct gaaggcgatc aagatatcga  
tactgcttta  
6781 gatgatgtcc ttgcagacca aatgatcgcc cagaataaga ttcgctacgt  
cctgaccact  
6841 gactttgaac gtttcttggc ttgggatact gccactaatg aacggctaga  
tattgacttt  
6901 gaagtcttac accggaatta cagtttcttt ttaccactgg tagggtaga  
gaaggcaatc  
6961 cttaacagtg aaaagccagc ggatgtaaaa gcggcagtca agatgggtaa  
gctgtttgac  
7021 cttattcgcg ttcataatca tttgaacacc cctgaagata ttcatgcact  
gaacgttttt



7081 ctgactcgcc tgctgttctg cttatttgca gaagatactg gtatTTTTcc  
aaagaaaagc  
7141 caatttacgt ctgcgattaa gagcatgacc tcggaagatg gtagtgattt  
agatcagttc  
7201 ctttctgatt tgtttgtggt tcttaatagc cctgaaggaa gtgaccacg  
taatcgtttg  
7261 ccgcagcacc tgattgattt cccatacgtt aacgggtggct tatttgaaag  
tgatgagtcc  
7321 attccgaagt tagggaaaaa accccgccgt attctgattg actgtggact  
ggaggattgg  
7381 agcgctatta accctgatat cttcggaaagt atgttccaag ctgttattga  
tgtggatcag  
7441 agagcacgac tagggcagca ctatacctct tacagcaata tcatgaagg  
gattcaaccg  
7501 ttatTTctag accccttacg acttgaatta gaaaagcagc gtaaaagtgc  
taacgggtta  
7561 aaacgccttc ttgttcgatt aggtaaaatt aaagTTTTtg accctgcttg  
tggttctggc  
7621 aactTTctga tcattgctta taaagagtta cgTTtgcttg agattgaggt  
tattcaggca  
7681 ctgatgaaaa tcgaccaagg cttctttatc agcaatatac atctggatca  
gttttatggc  
7741 atcgagatcg atgactttgc ttgtgagatc gcacgtcttt ctctttggtt  
ggctgagcat  
7801 caagtcaaca aacaatggga agaacacatc ggccccccac agccagcact  
acctcttaaa  
7861 acaacaggta gagttgtag cgctaatagt ttggatattg attggcatac  
agtttgcct  
7921 aactctggga atgaagagat ctatgtgatt ggtaaccctc cgtttaaagg  
gcatagagga  
7981 agaagtgata atcagcgttc tgaaatggta agagtattta aaggctttaa  
atctataggt  
8041 ttattagatt atgtggcctg ttggTTTTtg aaaggtgctg agtatattaa  
gggtacgaat  
8101 gctgaattag cgcttgtgtc gactaattca atatctcaag gagaacaagt  
tggtactctg  
8161 tggccaagta tttttaattt gggagtttctg attcatttag cttatccaac  
tttcaattgg  
8221 gcaaacaatg ctaaagataa agctgcggtg catgtagtaa ttataggatt  
aaccgcaaaa  
8281 agcaagaaaag ggctattatt tgaacgagtt gaagaagatt ggcattcaag  
agtcgttgac  
8341 agtattagcc catacctatt ggaaggaggg aaagcttgtg tgttggctgc  
aaaggctcct  
8401 ctaaatagtt cagttccacc cctgctatTTT gggaatatgc ctaatgatgg  
tggatactta  
8461 ctgctaaatc gaagtgaacg agatgagtta atagcaaagg aaccagaagc  
taaaaaatgg  
8521 attaaaaaag tactaggtgc agatgaattt ctaaattcaa aagaacgctg  
gtgcttatgg  
8581 ctaaaagatg caacaaaatc tgatttggca tcaatgcccc ttgtactaca  
aaggattgaa  
8641 aaagtagctg aaaaaagaag aaaaagctca gataaaggaa cccaaaagct  
agcagataga

8701 cctcatcaat ttcgagactt aaataatcca agtaaataata tacttatgcc  
tagcgtttct  
8761 tctgcccgcac gaagatatgt gcctgttggg gtgtttgatg aaagtgtcat  
ttcgactaac  
8821 ctgaattaca taattcctaa tggacaatg tatgagtttg cgattctgtc  
ttcgctgatc  
8881 cataacgact ggatgagact ggtcgccgga agaataaga gtgactatag  
gtattccgca  
8941 tcagttgtct acaacacttt cccttgatt acacctagtg atgcacaaag  
aaaagagctt  
9001 gaagttttag ctgaagatat tctatttgcg agagaagatt accctggaaa  
gactcttgct  
9061 gagttatata acccagattc tatgccatta ggcctattaa gtgcatca  
gaagttagat  
9121 acggctgttg atagactgta tcgtaaaaaa cttttaacg atacttctga  
gcgcttagcg  
9181 tgccttctat ctcgttatga agatatggta acaaaataaa aactaaagtt  
ggcaaagggt  
9241 tagataatga aaaacaatat cttacagggt agttataacc aacagggtca  
aagtgcctca  
9301 cacaacgaca tgggaatgcg agaaatgcag gctcgtgcat tcgctgaacg  
tgctagccaa  
9361 tatttactca tcaaagctcc tccagcatct ggtaaatcac gcgactgat  
gttttggga  
9421 ttggataagc ttattcatca gtcggttcgt aaactgatcg tcgctgtacc  
tgaagtgtcc  
9481 ataggtggct ctttaaaaga tactgactta atgaagtctg gtttcttcgc  
taattggaca  
9541 gtaaaaccag aaaacaatct gtgtatcagt ggaagtgaga gtgtaagac  
taatgctttt  
9601 aagcgcttta tggagagtga tgatcaaatt ttagtttgca ctactcaac  
actcgaagc  
9661 gtctttgata agttgttacc tactgacttc gataattgcc ttgttgctat  
cgatgagttt  
9721 caccatgttt ctgctgatga aaatagccga ctgggtagtc ttattgatgt  
tttaatgaag  
9781 cagtcacag ctcatattat cgcgatgact ggctcttact tccgaggtga  
tacggttccc  
9841 atattgctcc ctgaggatga agcgaagttt actaagggtga catataccta  
ctacgagcag  
9901 ttaaatggct ataagcacct aaaaactttg ggtattgggt accattttta  
tcaaggccgc  
9961 tatgtcaatg cgttaccatc tgtacttgat ccgacaagga aaaccattat  
ccatatccca  
10021 aacgtaaatt ctggtgagtc taccaaggat aaatacaccg aagtcgactc  
tattcttgag  
10081 gtgctcgggg atgtaatgat gcaagacca gagactggta tttatcaggt  
gaaatgtgca  
10141 aaaacaggta agacgttggt gggtgcaaac ttagttgatg acagtgatat  
gcggcctaaa  
10201 gttcaggcat acctgcgtaa tatagagtca gcagaacaaa tggacatcat  
cattgcattg  
10261 gggatggcaa aagaaggttt tgactggcct tactgcgagc atgttctgac  
tattggatat

10321 cgtagttcta tgacggagat cgttcagatt attgggcgtg caactcgtga  
tagtgagggg  
10381 aaaagccacg ctcagtttac gaaccttacc gctcaacctg atgcacagga  
tgatgacgta  
10441 aaggtttcgg ttaacaacat gctgaaagct attacaacct cgctcttaat  
ggagcaaata  
10501 cttagcgcga gcattcaatt taaacctcgc tctcagtgga atgggtgagga  
ttaccagcg  
10561 aataccctaa tcgttgatga caccaccaca tctgtttcgc aaaaagttct  
ggatatacct  
10621 aatcggggca aggacgagat tctttcagca ttattatcta aagagtcggt  
tgtaaaggg  
10681 gcgattgccg atacgatgcc agcagaggtc attaatagaga ttgaactacc  
gtctgtgatt  
10741 caaacgttat atccagatct agaagaacac gaaattgaac agataagaac  
gggtgtggtg  
10801 cacagtcttt atattgggtca gaaggggggc ttaattgatg gtaaagacct  
tcctgaagat  
10861 gcggtgattg aagatgggtg tgcctcctat ggtaatggtc ataagtctaa  
agataatggg  
10921 gaatcagga cgagtaatca gttataaaa atgggtgata agttcattaa  
tattgagagt  
10981 ttagatatag acttgatcga ctcagttaac ccttttcatg gtgcttacga  
aatcctatct  
11041 aagtccgctg atgctgccgt gttgaaaact attcagcaaa cagttcagac  
tagtcaggca  
11101 aatgtttctg aagaggaggc tgttatgctt tggcctagaa tcaaagcctt  
caaagtcgaa  
11161 caccaacgtg agccttact aaactcctca gatcctatag agcagcgta  
tgctgacgtt  
11221 cttgcttata ttcgtaggat gaaacagcaa cgcattggcg agcaataaga  
gggttatcac  
11281 caaatgatcc gattacgctc ttctaaggct acagagaagt tcgacttaga  
tgatattttt  
11341 tcagaacagc atgatttggg gctactcgat gtagctccct tgagggcaaa  
gattcccact  
11401 gggaatatat tagccaatca atttgaagaa atttctaatt tctacgaaca  
aatgggtcga  
11461 gtcccacgta gtgatgctca atcattttat gaaaagcgcc tagcgcgccc  
tctcaatgcg  
11521 ttttaagtcta atcctgaaca atgtgacgta ttatctgaat acgaccgta  
tagcttgcta  
11581 gatagcgatt tagccgcgca agagaatgta caaagagata aggtcgaaga  
taagtcttta  
11641 cctaccgagc ttgataagtc tgaactcgta acttctctag atgatatactt  
tgacgatgac  
11701 gacgatggcc ttttagagtt tgatgctcct cacctgttca ccaagacca  
tgtgctgct  
11761 gagaaaaaat ctcagccaaa tgagattgcc aggaggcaac cttgtgctga  
gttccaccgt  
11821 ttttccccta tattcgaaac gatccaacag gaaattagat caggctctgc  
atcactagag  
11881 agatttcgct atgaacttca gatgcgtggt ggggatgtct ttatccttaa  
cggcctgatt

11941 ggatatgtcc attcagcagg cgaacggtta gaggggtata gtagctataa  
tgccagattg  
12001 cacctgatct ttgagaatgg tacagaaatg catatgttgt tccagtcggt  
gacgcatggt  
12061 ttagttcgcg atgaacgcgg gtgtaagatt attcgtgaag gtgagtctct  
tgagcctgat  
12121 gatacccctg ttccggcggg actcgtttat gttctagcta ctaagagtac  
agatagtgca  
12181 ttagcacctt ataaggcaaa cctttataag gtcggcttta cagatggtaa  
ggttgaagaa  
12241 cgtattaaat atgccgagaa ggataaaacg ttcttagagg ctctgttcg  
tgttgttatg  
12301 accaccgagt gttacaacat cgatgctcat aaacttgaaa cattgatata  
tgattctta  
12361 gggcatcgta ggtaaactg cactctcaaa gggcatgcag gacaatatag  
tccaagagag  
12421 tggttttatg tgccgttgaa tactgtttta gaggttattg gctacatctt  
agatggaacg  
12481 atatcccaat acaggatgga taacacgacg ggtaaagttg taaaaaata  
agctgcttta  
12541 agcctttgtg tagttgaaag cattatcgtg gttatgttct tagcataacc  
cgttttgatg  
12601 acgtatgtcg gtaggaggg gcttttagaa agagcagaaa gtcccaagg  
ccgctaggag  
12661 gcgttattgt ctgtagtaac aactcact ctcacatccg ctgttttgga  
cacgattaga  
12721 tactgtcagc ctgagggat atcaactcgc aattggatat ttcctagttg  
aaccattgct  
12781 aatgtagtaa agcctaaatt aagtaaggta tggcaaatta tccgttagtc  
tagtgtcaag  
12841 agtcacaaga gaacatcaac aatgaatgc cttagtgtga ttagttccga  
ctagatctga  
12901 cacttcaatt tgaaaagaag agagttacc actttgatta aagggtgctta  
atcactaatc  
12961 aaagacaaaa agaggtaact ctcatgcttc atactagcaa tccaattatc  
aaacacaaag  
13021 cgggccttct caatcttgca gaagaactcg gtaatgtatc tagagcctgt  
aaggttatg  
13081 gggatcaag agatactttc taccgttatn caagagttgg ttgagacggg  
gggtattgat  
13141 gctctgatta accgtagccg aagagcaccg aatttgaaga accgtgttga  
tagtgaaact  
13201 gagcaagccg ttatcaaata cgccatcgac ttccctgctc atggacaagt  
tagaacgagt  
13261 aatgaattac gtaaattggg agtgtttata tctccaagtg gcgtacgctc  
aatctggctt  
13321 cgcaatgacc tagagaactt caagaaactg cttattgcac tggagaaaca  
ggtcgcagag  
13381 aacggtatta tctaacgga cgagcaagtt gggctcttg agcgtaaagaa  
gcacgatgat  
13441 gaggttggtg gtgagataga aacagcgcac ccaggttatc tcggctctca  
agacacattc  
13501 tatgttgga acttgaaagg tgttgggcgc atctatcaac aaaccttcgt  
tgatacctac

13561 agtaaagtcg ctttgccaa gctctacaca acgaaaacac caatcaccgc  
agcggatata  
13621 ttgaatgata aggttctacc gttctttgag gcgcatgaac tgccaatgct  
gcgaatcttg  
13681 actgaccgag gcactgaata ctgtggtcgt gttgagcagc acgattacca  
gctctaccta  
13741 gccattaatg atatcgacca cacgaaaact aaagcgatgt caccacaaac  
aaatggtatc  
13801 tgcgagcgct tccacaagac catattgaat gagttctacc aagtgcatt  
cagaaagaaa  
13861 ctgtatggtt ctatcgaaga gttgcagaaa gatctggacg aatggatgga  
ctactacaac  
13921 aatcaccgta ctcatcaagg aaaaatgtgc tgtggcagaa cgccgataga  
aacattagag  
13981 gatgggaaat caatctgggc tgaagaagaat ctagcccaga tataatctga  
caggcaccaa  
14041 gtcgaaaagt gggtaactgt cagatcaggt ctgaattagt acaccttaag  
tagtcaattt  
14101 ttcagatttc attctagtta aaggggttat tatcgttttt gtgccctca  
ctgtgaacgg  
14161 ttgaaccaat ggagataaa gatgcttctt ctgctgccag ttctggaaag  
tccgcttctc  
14221 tgggatcgtg gtgaatatga aggttatcgc cctgaggtat gggctgattt  
gtttttcac  
14281 acacgttacc taaacctgt ataactctt gattcttata atcttgcttt  
gccttggtag  
14341 actttgtttt caccgtctct gatgcaatgg cccgctcctc attaagctta  
ggcatcatat  
14401 tgattttatc aataacttgc tcaaattgct gagcttgaga acgcacgttg  
gggtcaacat  
14461 ctctcaactt agggtcattc agtttcaaag cactagaaac acgaattaag  
gtttgctctt  
14521 gatcaatgat cacttgctct tcagatgcat ttgcgacatg ctcgttcact  
tcaccacgag  
14581 tcaatggaga gttttcaacg agatcgtaa cattgataaa caattgacta  
ttgtaacct  
14641 tagtatctgt atacacttgt aatacactaa atccttgctc attcacggaa  
agttttttg  
14701 tggatctaa gtgatattta aacatgggca tttttattca tcacctgaa  
ctttgttgtt  
14761 taacagcgca attacctgtt cataatctaa cttacctacc tcattcacta  
tacttcgtgt  
14821 tgcccaatc cgcgctcgt ctccgcaaga acgtgggttgc tccgagcgct  
cttgcaaaaa  
14881 ttgtttggta agatcgctgc gaataaggta tttattattt atttttatta  
ctcaccatc  
14941 tgccgcatct gccattaact ctctgaatgg ctttctatca gttccaatgc  
atgacactaa  
15001 tgaatcaaca ctaaaaaatg gagtaggtgt tttggtctga tgatcgatct  
tcataataga  
15061 cttacttact aatacttgat tgttttcggt aagtttttca tccaaatcgg  
gggagatttc  
15121 gatgggtttc acgtcaatca attccgatag tggcttaagc tctatgggta  
aatttggtgc

15181 actcatgaac attaccact aatatgtaac ttgttatag agttgcttta  
atztatcgaa  
15241 agcctccgcg gcccttggat catcattttt gtctggatga actttatttg  
acagtgactt  
15301 ataccatttt ttagctgcat cctcgtcctc atacatctct gatgtgatac  
caagcaattg  
15361 gtttcgacgc ttaccatcaa cctctaacia caaaaacaaa atgcatcgt  
ttccgactt  
15421 gaagtacgcc atatcatcag ttgatgtcct gacaagatta acctgtagat  
cagcctcttc  
15481 agcggtcgta ctgattcaa catagggtga ttgtaattct tggatttttt  
tcttgatatt  
15541 tctcaacaag aaaagaagt gcacaactgt taataggagt gcaaaaacaa  
caacatacag  
15601 tgatgtcata tatatttctc tggtagtctg aaaagtatag gaatgtttta  
taccacatca  
15661 cctcaggctt gcataagtga gacagttagg aaaggcatat cacattgatg  
aattcgtgtg  
15721 gcggatgaga aatgtggcc acttagctag agcatttgtc ataagaaaa  
gtaagtcaaa  
15781 gaccaaactg aatgctatgc acgaaagcaa cctaacaac aatggggaat  
gaacgtgcca  
15841 gaacggatcg gcctgacacg agtagggaca aatccttgtc agtgactttc  
ctaaattgta  
15901 ttagttccga ctgatctga cacttcaatt tgaaaagaag agagttacc  
actttgatta  
15961 aagggtgctta atcactaatc aaagacaaaa agaggtaact ctcatgcttc  
atactagcaa  
16021 tccaattatc aaacacaaag cgggccttct caatcttgca gaagaactcg  
gtaatgtatc  
16081 tagagcctgt aaggttatgg gggatcaag agatactttc taccgttatc  
caagagttgg  
16141 ttgagacggg gggattgat gctctgatta accgtagccg aagagcaccg  
aatttgaaga  
16201 accgtgttga tagtgaaact gagcaagccg ttatcaaata cgccatcgac  
ttcctgctc  
16261 atggacaagt tagaacgagt aatgaattac gtaaattggg agtgtttatc  
tctccaagt  
16321 gcgtacgctc aatctggctt cgcaatgacc tagagaactt caagaaactg  
cttattgcac  
16381 tggagaaaaca ggtcgcagag aacggtatta tcctaacgga cgagcaagtt  
gcgctcttg  
16441 agcgtaaaga gcacgatgat gaggcttgtg gtgagataga aacagcgcac  
ccaggttatc  
16501 tcggctctca agacacatte tatgttggca acttgaaagg tgttgggagc  
atctatcaac  
16561 aaaccttctg tgatacctac agtaaagtcg ctttgccaa gctctacaca  
acgaaaacac  
16621 caatcaccgc agcggatata ttgaatgata aggttctacc gttctttgag  
gcgcatgaac  
16681 tgccaatgct gcgaatcttg actgaccgag gcactgaata ctgtggctcg  
gttgagcagc  
16741 acgattacca gctctaccta gccattaatg atatcgacca cacgaaaact  
aaagcgtatg

16801 caccacaaac aatgggtatc tgcgagcgc tccacaagac catattgaat  
gagttctacc  
16861 aagtgacatt cagaaagaaa ctgtatgggt ctatcgaaga gttgcagaaa  
gatctggacg  
16921 aatggatgga ctactacaac aatcacgta ctcatcaagg aaaaatgtgc  
tgtggcagaa  
16981 cgccgataga aacattagag gatgggaaat caatctgggc tgaaaagaat  
ctagcccaga  
17041 tataatctga caggcaccaa gtcgaaaagt gggtaactgt cagatcaggt  
ctgaattagt  
17101 acacctaaat tagcatttaa ctgattacct cagacattgt aaactctaac  
tgcctcgccg  
17161 aattcactta tccactacag actgtgttga atatagaatt gccgaaaaca  
tcatctaata  
17221 gttcgttgcg ctcttgctc atataacca tcctctgggt taaaagatg  
acattcttc  
17281 atactcaaac aaccacagcc gatacacca gagaggttat cttttagtga  
ctggatcttt  
17341 accatttttt tgtcaagatc ttgctgccac ttcttcgcaa ctctatcca  
atcttgttta  
17401 gtagctgttt tgttcatagg taaggactt aactcatacc ttatttcttc  
tagggtaaac  
17461 cctactgact gtgccacttg gataagtgcg accctacgta acatagaagg  
caagtaacga  
17521 cgttgattac tattggttcg aaaagatgtg atcaactggt tggctcata  
aaaacgtaaa  
17581 gccgatgtcg cgacaccact gcgttctgat aactgcccaa cggtaaggta  
atcatttcta  
17641 atcataatta ttctaacttt tgtcaattta tcgctttact taaagttaac  
ttaaactttt  
17701 atactccttt caaatataag actcaacgca taaaaggata tgatcatgcc  
gaaatccccc  
17761 ccataagtg aagagatgcc aaattgcatg tcggcagata cgcagtcaat  
aagcaactta  
17821 attcctgtac ctaaactagc gctggatagc ataacaattg atggtgatgc  
cgttactttt  
17881 aaatcggctt agccagtacg ccataatctg tttcaacttt tcatacagct  
caacctgttg  
17941 agctgcgttt ggattcttta ctatgcttaa aaactatttc actttgatcg  
caattgggct  
18001 gatttgggga tcacaattta tttttcaaga aacagcacta gaagcattca  
ctccagtatg  
18061 gataggcaca ttcctgtcgg tactcgggtc cacaaccctg tttattattt  
gtcgaataat  
18121 gcgaatttgc agtagtagta aacagtggaa actctacact gtaatcgggt  
ttcttgaagc  
18181 aactgttcct ttcgttctcg tgccttttgc tcaaaaagag ttgagtagtt  
cagtgactgc  
18241 aattttaatg ggaacattac ccttttacgc acttcttctc gcgccattat  
ttattaggaa  
18301 taaaaagatc accaaaggaa acctgttcag tataaccatc ggtttttttg  
gtttagttgt  
18361 acttttctac cctgacctaa tttcatcatc tcaaaggatt gagcttgtca  
gcgtgctagc

18421 cgtcttactt gccgcagtat gctttgctat tgctttgcta ttgctaaacc  
gtgttcaaag  
18481 agagcatcct ctgatagtcg caagaaatgt tctgaccatg gcgagcattc  
aactgatcat  
18541 tgctgctctc attacaacga cgagaatgac atataaagca ccatcgccga  
gcatttttat  
18601 tgctgtaatc tatcttggtg tcatgtgtgc gggagttgtc tattacttat  
atatgactag  
18661 cgtcaagaat gcaggagctg tttttacgtc aatgactaac tacctcgtac  
cagctgtagg  
18721 tgtattaatc gctgcgctag tcacgaatga aagcatacag actacaactt  
ggctggcact  
18781 tgggtattatt ttatcagctc ttttattgaa tcaaattggtc gaaaagtatg  
aacaanaaac  
18841 ttagcgggaa tgttcaggct atagttgtaa ctttttagta aaacaaaacg  
ctcgggtgtac  
18901 ttcacggggc gtgtgtactt taaagcctta tctaattctta cttgattata  
ggttttatta  
18961 cccatcagtc taacttgctt caaatgtcctt aggttcaaata agtaaaaactg  
aaagcgttac  
19021 acttcaaaaag agatacctat tagttttgat catgaattat aacgcattcc  
gaaacaaact  
19081 ttggggcaaa aactagttag ggtgtttaag taaaatagcg ctgtaaggat  
taggagggat  
19141 aatgaaaaca taccgttgca gggcttaaaa acaacaaaga gacaatttaa  
aaattatctc  
19201 tttgtaagtt gggctacaag agagtcatac ttttaaagtc ttattatgca  
tattgtagaa  
19261 atcacctaca caatattcac tgtgattaag gtcgctatca atcatagatg  
tagtgaaaat  
19321 gatttggtgc tctacatcta gagagttgga tagtttcacg atctcacgct  
ggaaaagttg  
19381 gcttcggttct tcttccatcc ccttatcttc aatattgtcc ataagtaaga  
agcgagggta  
19441 caaataagaa gagtcttcac atgagcactt aagcatagcc aatctaaatg  
cgttcttttag  
19501 ataaaccatc gaactagcag aaaacaaggc tctatcatca atggctcactc  
gatcttctgc  
19561 aaagtcgaac tcgactttgc taccatcaac gaatatttct tcatgtccag  
cgtcagcttt  
19621 aagaatactt aacgttgctt ctgatagctt tctcttcttc gctttaagct  
cattttccat  
19681 tcgctgcgtc aatctagtga tttcatcatt cagcgtattg aagtctgtct  
gcaacgtatc  
19741 tcgttcatca tataatccat agagtttagc gaactcttctc ttactattgt  
tcagtgttct  
19801 gatttcattg cgtaaaccac ctatttcact gagcttttgc cttagctgta  
tattcaccgc  
19861 tctttgaggt ttgcggatga tctcaaggtc tcgttccaac tcgcctaact  
tagtttcaag  
19921 ctggttcgat tcaaccttct gctcatcaag ccttatttgt tttttctcta  
tcagaagaat  
19981 tgactcggca atctggaact ctatttcttt tctcacttta aatgtagggg  
cgatattatt



20041 ctcagattca ggttttggtg caccacacaa agaacaacct gtaggtcttg  
cttggacctc  
20101 tgtttggcaa gctgggcagt gattaaatgc aacgtcagat aaagcgttga  
tagtatcttg  
20161 ggtttcttta agagccttaa ctctacggct taaagactca ataaacatct  
gagagtcatt  
20221 gatttcaaaa gacgttttag ctatttcttg ttggcttgct gtgtactttc  
ctcttgctc  
20281 ctgaacctct acaatcaaat ttttaagtac ttcattcttct gtacaacat  
cttccgatgg  
20341 gctagaaaac gattcaacct ctagctccag cgcatcaatc tctttacgct  
tttcttcaat  
20401 ctcaccattt atttactaa cagattttat cgtaccacc aaatagagt  
gtatggtttt  
20461 aatctcttta attcgatttt ccaacgctag tttcaagctc tgtaatctga  
cccgtttttc  
20521 atagagttca aaatctgaca agccgatcaa tagctccccg atagcttgac  
gcttgtttg  
20581 tgaatcgaac ttatcaaact tgaatagtcg atctgggtgac gtcattctgat  
caacatagag  
20641 cattctaagt aactgatgca ttgtaatact gttcttgca tccgactttg  
aatacggcat  
20701 accaagctct ttgaacaagg cttgataaaa actttctttt gtattggcgt  
tataagggta  
20761 acgaatccaa tcagtaacag atgcaacgta tgctgattca tagtctccgc  
taaataatc  
20821 catccctttc cttccaccct ccgcgatttc ccgctttagg gtgaatacct  
tgccgcttag  
20881 agaagcttcg aaaaaacga agctacactg cttcgcttca ttcttaagct  
tagttaaatc  
20941 accgccaagg ccgtagaata taaagtctga gatcgtagac ttaccagaac  
tgtttacgcc  
21001 tctgataata ttcacaccag cagtgaactt ttcattcatag gcaatacttt  
tgcttttgg  
21061 aatgactagt cttttgacta ataagaaagg tttatactgc gtcataatctg  
tattccatta  
21121 agcctgttct tttcttaagt ccactttcac caacaatctc aatcgcattt  
agggtttgga  
21181 atagcttgca aaaaagctcc gtagactcat tagagttatc gttaatcagc  
ttttgaatag  
21241 acgggctata gaaccctct gagatccgca agttaccggt ttcttctca  
aaaatacct  
21301 ttgcttttag tatttgaagt gcctgtatat ggtagtcgcc catctctgaa  
aatagtcggt  
21361 tcttatctgg tagaacttcg tatggttgat ttattgagcc aaagctacgc  
ttcaactcag  
21421 cgattccttt agttcttggga aactcaatat cttttacaag gtgtggaat  
aggtaaaaca  
21481 aatcgtaaat acgcagtctt accgagtcaa aatcctctaa atcttgcata  
cttgctatgc  
21541 tgataaacct aaacatacag tggtaaagat cgtttcttgg atgataaata  
atcactttta  
21601 atcccactct acatagcagt tacctgtaag tatatacagt agtccgtaca  
gctcatcttt

21661 gtcaatattg aggctgcacc catgaacact ttccaataca ggttgatga  
ttttttcttc  
21721 gactaaatca ttgatttggg agactttaaa gtcgccagat ttaatgcgtg  
gtgaaatctc  
21781 gtggagaaac gtggttctga tattagtggg gatatatgtg tagagttcct  
gagccgattt  
21841 gtaatgagag aactgcatta tcttcttcga tacacgctct ttgacatcca  
tagcgtaatc  
21901 caagagaaaa tctctgttac catcgggtgag cttttgccct agatctcgaa  
gcttccttc  
21961 gacttttcgt tccagaaagt tattgagctg actagaaaaac tctttgtact  
gttcatcttt  
22021 ctgaatttct ttttcatgct cttcaacaag ctctcgcagc ctatgatctt  
gacgatacat  
22081 aactggagct gcgtgattat atgttatgtg ggttgagtga tcatgaacat  
ctcgtccagc  
22141 gacactacgt ccagcattaa cgttgtcgaa agaggcttta tttgaatcca  
gtaccgacac  
22201 ttatgaccct tttttgtccc taccaacaac atcgcctcca gcgcgaatat  
tgctcattgt  
22261 tacattggtg gaagatgctt ttgacctaaa gaagaaataa cctataactg  
cgacaatagc  
22321 cgctacgatt aggctaaca cgtaaacacc taagccagag aacaaaacat  
cgaagttttc  
22381 gcagaccagc tttatagctt catccaccct aacatcctcg tggtttttcc  
ctaaacttta  
22441 caagtattta attttattca caaatcgaca agccaaaaat atctacttac  
ttctcaatat  
22501 atgcaatcgg ttaggtcact atgtagatgt atggctgaat cgaccaagct  
tctttgaaca  
22561 ttgcactgat tagaaaaatt acttcaaatt gtacacacta gatatgatgg  
attcgcagtc  
22621 taaatcgaaa tggggcaaaa ccaagctagt tctgtattag atagagcata  
attcacacta  
22681 tctcagcatt tgatTTTTGG taaatcttgc caacgggtgg tgtattgagg  
cgacaacatt  
22741 tcacgccgca tgcccattt ttgagttatg cttgagcag caagaaagat  
agcatcattc  
22801 ccaaatcgat tgtttaacgt gtcatacaca ttcattagct taggattatt  
cggggtcagg  
22861 ttgaacagat cgggctgctc atgctgaccg tcaactaagt caatcagccc  
aacaccaatt  
22921 ttataaaatc tcacatcctg ttggaataac tgctctgcca gtcgagaggc  
ggcttgagtt  
22981 atcagagtca catcagcagt aggatacgc aaacgatgaa ccgctcggcg  
tgccacagga  
23041 ggcgagtcaa atgggtgaact gttagcgaaa caaagcatca ctcgacacag  
tgatTTTTGT  
23101 tttcagagcct taaaggatgc aatatttgc tgcttgaca acgcttgctg  
caacgactct  
23161 aggtcagtaa ttctctgccc tgcactgcgg gtagaaaata tttgcttttt  
atccgctcta  
23221 gccgatccc agcccttaca tttttgtcca ttgagttcac gtactgtacg  
ctccatttct

23281 acgttaaact cttttcta at cagtgcagga gggtaattgg caagcttgag  
cgctgtatta  
23341 atacccatca tctcta atcg atgggttagt ttcttgcta tgccccacac  
ctctgagaca  
23401 tgcagttgcc ctaaaaccgc cttacgctct cgttcgctat ctaagacaca  
tacgccattg  
23461 tctccttcga tttttttcgc agcatgattg gccacttttg cttagcgtcaa  
tgtttgccca  
23521 aatccgacac atacgggtaa tcgacattca cgccaaacag cgcgtcgtaa  
tttcattcca  
23581 tgctctttga gagaacgaat ggctggaaag ctatgctcaa atgaaaggaa  
agactcatcg  
23641 atactgtata tgtgttgttc aggtgcgaag cgaccaataa cctgcatcat  
tttggcagat  
23701 aaatccgcat acaactcata gttcgatgac agagcaatca cacccttctg  
ttcacaagt  
23761 gctttaactt gaaagtatgg tttgaaactt tctatgcaa cttctttagc  
ttgtcgattt  
23821 gctgcgacaa tgcaaccgctc gttggttgac aaaacgatca tcggctttcc  
acgccaatcg  
23881 gggcgaaaaa cttgctcagc gctacagtag aaagaattag catcaaccaa  
agcaaacatt  
23941 atctcgttct caacaatgga ctcactcggg ggcaacgaat tgagcagatt  
acaatccctt  
24001 cgagggaaaa ttgatcaaat tcgtggatag gaacgggctg gtatcgctca  
ttagcagaga  
24061 ggagta atcg acgattgagg tcgatttggt tacaataaa ttccccattg  
aggtttgcca  
24121 ctatgatgct gaaatcttgc acatcta atg agcgatctac aataagtaaa  
tctttgtcga  
24181 agataccac atcttgcata gaatctccac atgcgtatcc cagaaagggtg  
gcacaaggat  
24241 gctcaataag aagctggtct agatctaaag cgagttgagt atactcttca  
gcaggactct  
24301 cgaagcctgt gataccagca tgagcaaaga tagggatgac tttcatacaa  
aacatatgct  
24361 gtatattgat acagtatatt gtatttcaga ttaggcattt tgcaacagca  
ctggtgagat  
24421 aggatttctg agctta atat catcaagaga actattgatt gacaactgga  
ctcaatatga  
24481 gttgtctcaa tgggatgatg ctcgtacatt cttggataat tccgagttac  
agtatttgc  
24541 aaattagtag ttagcggacg aattgaggta tggcaatacc ttctctacgc  
agaatggtct  
24601 accttgaggc gcgtgtctac agatatggtg gtgttatact tctccatgaa  
cta atagggt  
24661 attgccatgt actaatggga gggtttttat ttttaaatac ctgtttttta  
tcagttgttt  
24721 aaggtttatt tctcttttct attttctaga aagattatgc gaagacatat  
ttaaagacag  
24781 caatgcttca tgtaaaaagt actcatgttc tacgtatttg aaggttttca  
ggaggtagt  
24841 atgtagagc tgtttttaag tagtttgag agggtcgcta aaatacaacc  
tcagataact

24901 atcctcattc tagtgttagc cttattaggt agtgacttga tctcgttcat  
caatgacttt  
24961 atggcggtaa tgaaatgact ttaatgctct ggtctaaaat gccctcaaaa  
tggattgcag  
25021 agggaaatact aagagagtcc tttagtgggt gtaggagtgt tagtgatgat  
atcgctgctt  
25081 tgaagttggt cattgtactg tgttttcttg ccaagcaagt taaccgttcg  
agtggtagct  
25141 cgggtggatga tgttttggaa atcagggcaa catatgatca gcttacagat  
atgtgttctc  
25201 tgagccgttc tttgggtgtct agaggcttaa agaagttaca tataacaggg  
ttgttatcat  
25261 ccgctgggtg tcgaacaaaa acatatactt ttattcaagg agtctaccga  
ggatgggtgca  
25321 agcttccaaa aagagcgctt gttaaaaatg aggaagaaat cccagcgatg  
aaagcttttc  
25381 tcaataggta ttcccacgaa cgtgatgctc taaaatgctt tttgtacata  
cttgctagtc  
25441 gaagcaatag tagaacttac gtcgatctta gtcggggaac tatagccaaa  
aagactggcg  
25501 taagtctgga tgctattgat ggcgctatcg gatttctgca aagcactagt  
ttgatttcta  
25561 aagtagagga caaaggcttc ttggctaact ctattcgtcg tgatttgtca  
gaacgactgc  
25621 ataggtactg ggtgattggg agcagcagtt tgaactacaa gacatattcg  
gttgaaagtg  
25681 aagactctat tttgttagg gaaccatcgt tgtactttat ggagaacaac  
aggagataat  
25741 gcatatttca ttctcacgta attcaataat ttatctatta attcaatatg  
ttaattgacg  
25801 tattgagagg ttggactggt cagtgataca taatttctag atgtgctgaa  
ttcagataac  
25861 ttttggtgtaag gtaaaatcgt attactagaa tgtgcatgag tatttgctct  
aagtgaaaat  
25921 ggggcagAAC cgatttaggg ggacttgctca gatctatcca tatcggggaa  
acgaaattga  
25981 cagattgtat tcagaccaat tcaaataaac gcctgtttag cttttttcag  
cctcaatcca  
26041 gcttcaatct ctgcaacatg ttcagctcct aattcggcaa ctaaattggtc  
acgagttact  
26101 ctatcaaaaa cctcactttc atcctcatct tcataaagtt cagcttccgc  
gagttcgaca  
26161 tagtgaagca ttgctttgat actcgcacatgc ccagttaagc ctttaattct  
gtttaggatt  
26221 aggattgcga gttgagtccc gccgatggtg gtttttagag ccttaagttg  
ttgtaataca  
26281 agtagcgtaa taaaccgatg cctaaacagc tgggggctgc gtttatgttt  
gctcttaaac  
26341 ttccgactga atacatcata gaataagcgc gaaatcatta ttccactcat  
cggcaagtga  
26401 gagcttgggt gcacgaataa cttcccgaat tttgcacggt taactttagc  
aagccctttg  
26461 cttatgcat caagttcatt aactatatag tcatcataaa accgaatgag  
gtattgtgct

26521 gttgtaa atg aaatc ggaat aatccta aat ttatc tttgt tcttg ccttt  
ggtgg tttta  
26581 atttttatcc aaata agctg gtcgt tagcg ctgccta aag ctgatttacg  
gtaa atagct  
26641 tgagctgcct gtaagctctg tgtattgatg gtaagcttat ttagactaat  
aat ttcaccc  
26701 agtcctatag ccttaccact caaagatgca tttacctgcg cacgtaagac  
ttca attgta  
26761 tgagtg tcaa tgtttg cggc ttcacttact cgaatgcctg ttgcctcaag  
caa actaatt  
26821 agagtagaaa agaactcaaa acgat atag tccaccttcg cttccaagat  
atct aggtca  
26881 tcatatagac tttcgattgc agtatctggt attggacttc tactaccata  
gctct cacag  
26941 tggggatgc agtcgtgatg caagtaacgt ttcccataag gactgatttt  
tctttctgca  
27001 ttaaccaacc cttttgtaaa gtattcacca tcagtattag ctatagctat  
taacgtatag  
27061 ctcaa atggt agtatttttg tacatattca agaaaccgta gtgccatcct  
aactctgtta  
27121 gctatagcat ttcgatttag gccaatatcg tcttcgatat attggacgta  
gtcatataaa  
27181 tgagagtcgg taataaggcc aatagggaaa gggcgtcctt gaatatcgtt  
atatttcaa  
27241 ttttcataac attctaggta ttcaagaaaa taccgaatca tacctttggc  
agttttcttt  
27301 gaacggttcg gtattgcatc tgacattaaa aagtctgtcg caaaccaatt  
aacctcacca  
27361 ttaccatgca aaaacaaact tgattcccaa ctgatgtag gatcactttc  
atctgagggc  
27421 agacagtcct taacatctat ttttaggcta tctaatttca tatgttattt  
gccaaatatt  
27481 gacacaatat tttcttact ttcagcgaaa atatcatcaa attcatgaga  
gagtttgttt  
27541 aagtttgaaa ttgtctccct tagagcgggt ttaataaccg ttctaacttt  
acatagttcg  
27601 gtctggatgat cctcgtagta tgatttcaac gtccgtgaag cgtatttgtc  
acgttctttt  
27661 attaaagata ttaaagtgtt gttagcactt ctttgccgca atatctcct  
agctaacgat  
27721 tctataagtt ctgcttgctc ttttaagggca ctccgtagtt cacctttagt  
tttaactttg  
27781 ggatcgtcgt cattattgca ttcattctct gcttcagtaa cttgctcggg  
tggagtgcct  
27841 gtagtttcaa tcttgcttct taattcttct attttttagga gtaggtagtc  
cttacagtca  
27901 accactgatg aagcagagcc agtgaaggat ggatctat ttttactag  
gatttttttc  
27961 ttattgtaaa tggcaggata gctacgtgat tgtat tttgc cactatcaga  
gtatgctaaa  
28021 agtgctttta aactgatatg ggcggtaaat ccatctggca ctccattctc  
aataaaatca  
28081 ttaagaagga ttacacgaag tttaacctgt tcaagcgtat ccctccgccc  
tttagggccg

28141 ttgtggtttg gcgataattc ccttttaaga ttcattcttca ttaccacact  
ccatccaaac  
28201 aattaccttt cctgattcat ctgtgtagct atatatcttc gagccagata  
gaagttgctc  
28261 ttttataaat tcttttgcca actcatctga ctgattattg aatttaattg  
ttagctcagt  
28321 tttgattaca ttttccactt gtgatgtatc aacacctttt ttgtaaattg  
catctaatac  
28381 accctgtgct tcttcttctg atagctcttc gttacttacg tcctctagca  
agtaacgccca  
28441 agtttcctga gtgctgcggt gccccatgag ccaagatatg gcaggaaaat  
cacttatatc  
28501 agtaagcgca tagaaggcac gagcagcgaa tcgtcttaaa acatgggtac  
gagataaata  
28561 aaagcgtgat tcaataccat tcaccatttc tgttggaact tggataaagt  
cgccaaaatc  
28621 tttcagtatg ttactcattg caaagcgact cattttactg ttttttgggg  
gcagaccttc  
28681 cgctgctgag gtgtatTTTT caggaaacaa aaaggggtct tcgttttcac  
aatagtaatg  
28741 ctattcgcct tcagccagat atgagatccc ttcaaataaa acatgaggta  
taggtcgtcc  
28801 agtaacaaga atggaattct ctgtaggcgc agcctttcgg ataccaaaa  
acaactcata  
28861 gccaccccaa aatccgagtt ccaaattaga ttctttgagt tcaagtatct  
ctgttgttcg  
28921 cttaatgcaa aaggtatgtg ttagaatata tgttgctgca agcaatatcc  
tgtatccgaa  
28981 taaaacagtg acattttcac gtagtttctt tgggtgtagat cctttctgta  
actcattata  
29041 tctagttacc ttgaaatctt gagtaaactt gtttttaggg atggctacat  
tcaactggta  
29101 gcgtccttca aaaatatgag aacggagata acttggtattg ttcttgtgga  
ttttatttag  
29161 ctgtaattca cagtttatct ttgttgcaac aatactttct ccgtaaacaa  
ccacaatccg  
29221 aatagcttca ttcaaataat gtagagctgt tttggtagga atattaggag  
tgcgaccctt  
29281 tgatctgatg tgattttttt taaatgattt actaaccttt gcaataggat  
tgcaataatt  
29341 ctccagttca ggtaaatagt ttgaaatctt ctttaaaagc aatggtcctt  
tagtcagagc  
29401 atcaaaagta ctcgatgaaa tattattttc ttttctgta aataactttg  
ggcatgaatt  
29461 aggaaactca gattttttac cattattatt gccagtgatt gtcagtgata  
aatcaggaaa  
29521 tcgttccact aatctgtctg aaattaaatt cattgtaaag tctgatatac  
ttgtgttctg  
29581 cataccaatc ctttgtaaaa attcacctac tggtaattcg ttgtttttgg  
attctacatt  
29641 tatgtcaaat agttggattg ctgattctct atccatagtc gatatttttt  
ctaaaataat  
29701 atcagtaagc cctgtagctt tgtctgccct ccctgtggca atttccaagt  
gaaattttct

29761 tatatcggtg gtagtcagaa ggttgaatcc ttcttcggat acagcacttt  
caccgtactc  
29821 ttttaattaag aatagagcta atattttgag cgcgatggca ttgctattca  
tacttgaaaa  
29881 gcgtgtcagc aatgacgaat ttttggctctc tgttgataaa tgtcccgttc  
tatttagagc  
29941 aataactttc cttatagtgt tagttactat caggtattta tcctcatcaa  
gagtatcacc  
30001 tgttgtcggg atgtaatcat taaacgaaat atatgggagg tcggaaccac  
tttttctga  
30061 accattatca atatgccata ctgagtctga aaaattgcca tgaagccaag  
caaagtgcc  
30121 ttttgagggtg tcatctgatt tataagacca gtcagcccct tcacgaagct  
ttacgttatt  
30181 gatattaatt agagtcatac tgaacctctt gctttattat ttttagatca  
agcaagcttc  
30241 cagttttttt ctcatatagt aggttacct tctgcaaagt tcgcattagc  
ctcctatctg  
30301 gatgtgtggt caagtatccc gtcaaccct gatacacgaa tgatagttct  
gaaatgctgt  
30361 cttctgtatg attggcagaa tctatgcgct gcattgctat ctcatgacaa  
gccttcatta  
30421 aggctatatt ttcaggacag atgtctagag taattttaat atcactggct  
gtactggaat  
30481 tcctattggt atcagatata gtctctatca cgcttctcca gtgaggaatg  
cgctcatcta  
30541 gccgagataa atactccgtt agctcagttt cgtctttcag cttcagagcc  
ttaatttgg  
30601 atttttgtcc atcagtagcg ctgctgatca atacatgctg gaaccgcctt  
actcgtggt  
30661 tataaaccgc caactgtaac tcttggggta agtaatttct tatggacaca  
gcttcagagt  
30721 tccaagata ttagctgca acagcagggt ttccaccact ttcataccaa  
cgaatgacac  
30781 cctcagtagc acggagcttc ttggctggtg gagctgccat tagcacttca  
tcaatacatt  
30841 ctggcggttac tccttcacac caattagggg tgtttttaag gatctttttt  
gcttcgacaa  
30901 gtaggcgaac gaaaccactc ttaaaagcca taccactcat tggcattact  
ttatgagttg  
30961 cagtagctgt ctgatacaaa aataatctat tggcatcatt gcccgatgcg  
agagagcgg  
31021 gatatgaggt tgctcaatg atgtagttaa aagccttttc aatgaacgga  
gtatccgttg  
31081 catgcctcaa attgcgcttt aaatgctctt tagctcttgc tttatggtag  
ctgactcggg  
31141 atccgtggtg agatggttcg aaaatcttgt taatcgagcc ttgagctgac  
aatgctaatt  
31201 tacggagact atcaacgtta ataccgatt cggatgatgat tatggtgacg  
caagcgacgg  
31261 ccgataacgt ggacaaacca aaatgctctc ttaactcata ttgattactt  
gtgaatctgt  
31321 aaagatgggt gttaccgccc aaaaaatgac gatcaactag tccattttta  
caatgtccaa

31381 tgtatgctag taagttgggt ttccacatt caccgtagg taaatctgga  
ttaaaaaggc  
31441 tgagtcgaga gccttttccg tttaaaaggg agggatgaag tagagtgggg  
ttattttcaa  
31501 acacactagc atctatTTTT tccattgcct cttgccccaa ggtaaacct  
tcgcaagcat  
31561 caatcagata gcttttagat actttataga tcacgtcacg atgctttttc  
atcgtggata  
31621 tcaaattacc tagaaaggca tctacatccg tttcaagtat taaggtgagg  
ctttccccg  
31681 tagtgtagt tgataactga aaacctccga ggactttggc ttgggagttt  
gtagtatcag  
31741 agaaaactaa agtatttaaa cgtcttgggg gagtgatgtg gttggttttt  
ggtaggcat  
31801 taactgaacg tttacaaagt ctcaacaaag cactccaaag gcttcgggaa  
tcactcagca  
31861 aggtgtgtgg ttgtttcttg acagcgccgc taaaatagaa ctcttgccat  
gcagagtagc  
31921 ataacgatac atcagctccc gtcttcatat gtaggttggt cttataacag  
aatgtgaaga  
31981 attcgtttaa catcctcgtc gtacgtcttt tgtaagagtc tgatttacca  
gagagaattt  
32041 tagtgatgga tatgctcata tttacagcat actgatgtgc catgattttc  
tggcagtgca  
32101 taccgtttat tgtatgctct tttatgttca taaacacttc caccgtataa  
tgtcattgct  
32161 aatactttga aagatattag cactaaggag tgttgtgtaa agcattgttt  
ttatactta  
32221 tttttatggt agtgcagtag gttaaaagaa cgatagtgga agattttggt  
caatatattg  
32281 agatgctgaa gttagatgag gacaggctcg atttatttat tataaccaat  
gtcagtatgg  
32341 atggggggaa gtgtgagttt atcctaacta tagattcacc agtgcctaag  
ctgtcgagta  
32401 agtgggtaat ttcattgtgag gattgtctga agctacatat agatagtacg  
acgagtccag  
32461 ctcatgacat tgccataaaa tacggcattt tagttattgg aacttcgtat  
gtaacaggag  
32521 cctatttcaa agccgtacga ctaaactgtt aagtttttat tCGgaagtgt  
agcattttta  
32581 tttggttctt catttgtggg gacgtgcgtc gatttctact tgcctacaat  
aaatectacc  
32641 ttataggtgt tcatttctt acctataat tgtgttttgg tttcttacga  
gaacttattg  
32701 caaactacgt agttaatgat atgatcttta aggataatct tttatttttg  
ttttaagtta  
32761 cagttttgtg gttccgataa aat  
//
